# Supplementary material for: Plasmodium falciparum has evolved multiple mechanisms to hijack human immunoglobulin M
Source: bioRxiv preprint, doi:10.1101/2022.08.03.502706, version 1 (2022-08-04)
Supplement: Extended Data Table 2 [file 502706_file02.xlsx]

## Sheet: Sheet1
Protein name	Codon optimized DNA sequcences
VAR2CSA	ATGGATTCAACTAGCACCATTGCCAACAAGATTGAAGAGTACCTCGGGGCAAAGTCAGATGACAGTAAGATAGACGAGCTGCTTAAAGCCGATCCTAGCGAGGTCGAATATTACCGATCTGGTGGTGACGGTGATTATTTGAAAAACAATATCTGCAAGATTACTGTGAATCACAGCGATAGCGGGAAATATGACCCTTGCGAGAAAAAATTGCCACCATACGATGACAATGATCAATGGAAATGTCAACAAAACTCAAGTGATGGGAGCGGAAAACCGGAGAACATCTGCGTGCCACCACGGAGGGAACGCCTGTGTACTTACAACCTCGAAAACCTGAAATTCGATAAGATACGAGACAACAATGCATTTCTCGCGGATGTTCTTCTTACCGCACGA…
TM284VAR1	ATGACAAGCAAGCGCGGAAACCGCACCGTGATCAACCTGAGCGTGACCGACGTGCTGGAGAAGATCGCCCTGCAGATCTACAAGGAGGAGAACGAGAAGAAGATCCCCCACGAGAGCGAGCTGATCGGCACCTTGTGGAAGGCCCAGTTCTCCGATGGCCTGAGCGGAAGCTTCGGAGATGTGCGCAGCGGACCCAGCAATAGTTGCAACCTGCACCACAAGTACTACACCAACATCAAGAACGGCTATCCACCAGCCCGCAATCCATGCGACGGACGCAACGAGAAGCGCTTCAGCAACGAGGGAGAAGCCGAGTGCGGCAGTGACAAAATCCGCGTGATCGGCAAGGGAGACGGAACAGCTTGCGTGCCATTTCGCCGCCAGAACATGTGCGACAAG…
DBLMSP	GATTCTAACCTGAGAAACGGCCTGCTGAACAACAGCCTGGACCTGACCAACGGACTGAACAACAAGGACAACAGCTTCATCGACAGCAAGATTGAGGAGCACGAGAACAAGAGCTACCAGAACAAAGACAACAACATCAGCATCGTGGGCCAGGACGTGCCCATCACAAGCGTGGATAGCAGCAAGATCATCAACGCCAACGACCTGGAGGGAAACTCAATCGACGACACCAAGGGCCTGAGCGTGACCAACTCCGGATTCGACGACGGCTCTGCTTTCGGCGGAGGACTGCCTTTCAGCGGATACAGCCCCCTGCAGGGAAATCACAACAAATGCCCCGACGAGAACTTCTGTAAGGGCATTAAGAACGTGCTGAGCTGCCCCCCCAAGAATAGCACA…
DBLMSP2	TINLGFNKCPTEEICKDFSNLPQCRKNVHERNNWLGSSVKNFSSDNKGVLVPPRRQSLCLRITLQDFRTKKKKEGDFEKFIYSYASSEARKLRTIHNNNLEKAHQAIRYSFADIGNIIRGDDMMDTPTSKETITYLEKVLKIYNENNDKPKDAKKWWTENRHHVWEAMMCGYQSAQKDNQCTGYGNIDDIPQFLRWFREWGTYVCEESEKNMNTLKAVCFPKQPRTEANPALTVHENEMCSSTLKKYEEWYNKRKTEWTEQSIKYNNDKINYTDIKTLSPSEYLIEKCPECKCTKKNLQDVFELTFD
H chain of anti-CD20 IgM	CAGGTGCAGCTGCAGCAGCCAGGAGCAGAACTGGTGAAACCCGGAGCCAGCGTGAAGATGTCTTGCAAGGCCAGCGGCTACACCTTCACCAGCTACAACATGCATTGGGTGAAGCAGACCCCAGGAAGAGGACTCGAGTGGATCGGAGCCATCTATCCAGGCAACGGCGATACCAGCTACAACCAGAAGTTCAAGGGCAAGGCCACCCTGACAGCCGATAAGAGCAGCAGCACAGCCTACATGCAGCTGAGCAGCCTGACCAGCGAGGATAGCGCCGTGTACTATTGCGCCAGGAGCACCTACTACGGCGGCGATTGGTACTTCAACGTCTGGGGAGCCGGAACAACAGTGACAGTGTCAGCTGCTAGCACCAAGGGCCCATCGGTCTTCCCCCTGGCA…
L chain of anti-CD20 IgM	CAGATTGTGCTGAGCCAGTCTCCAGCTATCCTGAGCGCTAGCCCAGGCGAGAAAGTGACCATGACTTGCAGAGCCAGCAGCAGCGTGTCCTACATCCATTGGTTCCAGCAGAAGCCCGGAAGCAGCCCTAAGCCTTGGATCTACGCCACCAGCAATCTGGCTAGCGGAGTGCCAGTGAGATTCAGCGGCAGCGGAAGCGGAACCAGCTACAGCCTGACCATCAGCAGGGTGGAAGCCGAAGACGCCGCCACCTACTATTGCCAGCAGTGGACCAGCAACCCTCCTACATTTGGCGGCGGCACCAAGCTGGAGATCAAGAGGACCGTGGCCGCCCCTAGCGTGTTTATCTTCCCTCCTAGCGACGAGCAGCTGAAAAGCGGAACAGCCAGCGTCGTCTGC…
H chain of anti-RBD IgM	ATGGGCTGGTCCCTGATTCTGCTGTTCCTGGTGGCTGTGGCTACCAGGGTGCTGAGTGAGGTCCAACTTTTGGAGTCTGGAGGAGGAGTGGTCCAACCTGGAGGCTCCCTGAGACTGTCCTGTGCTGCCTCTGGCTTTGCCTTCACCACCTATGCTATGAACTGGGTGAGACAGGCTCCTGGCAGGGGATTGGAGTGGGTGTCTGCCATCTCTGATGGAGGAGGCTCTGCCTACTATGCTGACTCTGTGAAGGGCAGGTTCACCATCAGCAGGGACAACAGCAAGAACACCCTCTACCTCCAAATGAACTCCCTGAGGGCTGAGGACACAGCAGTCTACTACTGTGCCAAGACCAGGGGCAGGGGACTCTATGACTATGTGTGGGGCAGCAAGGACTAC…
L chain of anti-RBD IgM	ATGGGCTGGTCCTGTATCATCCTGTTCCTGGTGGCTACAGCCACAGGAGTGCATAGTGACATTGTGATGACCCAGAGCCCACTGTCCCTGCCTGTGACACCTGGAGAACCTGCCAGCATCTCCTGTAGGTCCAGCCAGTCCCTGCTGCACAGCAATGGCTACAACTACCTGGACTGGTATCTCCAAAAGCCTGGACAAAGCCCACAACTTCTGATTTACCTGGGCAGCAACAGGGCATCTGGAGTGCCTGACAGGTTCTCTGGCTCTGGCTCTGGCACAGACTTCACCCTGAAAATCAGCAGGGTGGAGGCTGAGGATGTGGGAGTCTACTACTGTATGCAGGCTCTCCAAACACCTGGCACCTTTGGACAAGGCACCAGATTGGAGATTAAGCGTACG…
